# Supplementary material for: Uterine Preservation Treatments in Sarcomas: Oncological Problems and Reproductive Results: A Systematic Review
Source: MDPI journal article supplement (doi:10.3390/cancers13225808), 2021-11-19
Supplement: s1 [file s1]

**Table S1:** Search terms used in PubMed, Scopus and ClinicalTrials.gov.

| Database | Search term                                                                                                                                                                                                                                                      | Free-vocabulary and/or Medical Subject Headings (MeSH) terms                                                                                                                                                                                                                                                                                                                                                                                                                                                                                                                                                                                                                                                                                                                                                                                                                                                                                                                                                                                                                                                                                                                                                                                                                                                                                                                                                                                                                                                                                                                                     |
|----------|------------------------------------------------------------------------------------------------------------------------------------------------------------------------------------------------------------------------------------------------------------------|--------------------------------------------------------------------------------------------------------------------------------------------------------------------------------------------------------------------------------------------------------------------------------------------------------------------------------------------------------------------------------------------------------------------------------------------------------------------------------------------------------------------------------------------------------------------------------------------------------------------------------------------------------------------------------------------------------------------------------------------------------------------------------------------------------------------------------------------------------------------------------------------------------------------------------------------------------------------------------------------------------------------------------------------------------------------------------------------------------------------------------------------------------------------------------------------------------------------------------------------------------------------------------------------------------------------------------------------------------------------------------------------------------------------------------------------------------------------------------------------------------------------------------------------------------------------------------------------------|
| PubMed   | (((fertility sparing OR fertility preservation) AND (pregnancy OR Abortion Spontaneous OR assisted reproductive techniques))) AND ((Uterine Tumor Resembling Ovarian Sex Cord Tumor) OR (Uterine smooth muscle tumors uncertain malignant potential) OR sarcoma) | ((("fertiles"[All Fields] OR "fertility"[MeSH Terms] OR "fertility"[All Fields] OR "fertile"[All Fields] OR "fertilities"[All Fields]) AND ("spare"[All Fields] OR "spared"[All Fields] OR "spares"[All Fields] OR "sparing"[All Fields])) OR ("fertility preservation"[MeSH Terms] OR ("fertility"[All Fields] AND "preservation"[All Fields]) OR "fertility preservation"[All Fields])) AND ("pregnancy"[MeSH Terms] OR "pregnancy"[All Fields] OR "pregnancies"[All Fields] OR "pregnancy s"[All Fields] OR ("abortion, spontaneous"[MeSH Terms] OR ("abortion"[All Fields] AND "spontaneous"[All Fields]) OR "spontaneous abortion"[All Fields] OR ("abortion"[All Fields] AND "spontaneous"[All Fields]) OR "abortion spontaneous"[All Fields]) OR ("reproductive techniques, assisted"[MeSH Terms] OR ("reproductive"[All Fields] AND "techniques"[All Fields] AND "assisted"[All Fields]) OR "assisted reproductive techniques"[All Fields] OR ("assisted"[All Fields] AND "reproductive"[All Fields] AND "techniques"[All Fields])) AND (((("uterine neoplasms"[MeSH Terms] OR ("uterine"[All Fields] AND "neoplasms"[All Fields]) OR "uterine neoplasms"[All Fields] OR ("uterine"[All Fields] AND "tumor"[All Fields]) OR "uterine tumor"[All Fields]) AND ("resemblance"[All Fields] OR "resemblances"[All Fields] OR "resemble"[All Fields] OR "resembled"[All Fields] OR "resembles"[All Fields] OR "resembling"[All Fields]) AND ("ovarian"[All Fields] OR "ovarials"[All Fields]) AND ("sex cord gonadal stromal tumors"[MeSH Terms] OR ("sex"[All Fields] AND "cord gonadal"[All |

Fields] AND "stromal"[All Fields] AND "tumors"[All Fields]) OR "sex  
cord gonadal stromal tumors"[All Fields] OR ("sex"[All Fields] AND  
"cord"[All Fields] AND "tumor"[All Fields]) OR "sex cord tumor"[All  
Fields])) OR (("uterin"[All Fields] OR "uterines"[All Fields] OR  
"uterus"[MeSH Terms] OR "uterus"[All Fields] OR "uterine"[All  
Fields]) AND ("smooth muscle tumours"[All Fields] OR "smooth  
muscle tumor"[MeSH Terms] OR ("smooth"[All Fields] AND  
"muscle"[All Fields] AND "tumor"[All Fields]) OR "smooth muscle  
tumor"[All Fields] OR ("smooth"[All Fields] AND "muscle"[All Fields]  
AND "tumors"[All Fields]) OR "smooth muscle tumors"[All Fields])  
AND ("uncertainty"[MeSH Terms] OR "uncertainty"[All Fields] OR  
"uncertain"[All Fields]) AND ("malign"[All Fields] OR  
"malignance"[All Fields] OR "malignances"[All Fields] OR  
"malignant"[All Fields] OR "malignants"[All Fields] OR  
"malignities"[All Fields] OR "malignity"[All Fields] OR  
"malignization"[All Fields] OR "malignized"[All Fields] OR  
"maligns"[All Fields] OR "neoplasms"[MeSH Terms] OR  
"neoplasms"[All Fields] OR "malignancies"[All Fields] OR  
"malignancy"[All Fields]) AND ("potential"[All Fields] OR "potential  
s"[All Fields] OR "potentialities"[All Fields] OR "potentiality"[All  
Fields] OR "potentially"[All Fields] OR "potentials"[All Fields] OR  
"potentiate"[All Fields] OR "potentiated"[All Fields] OR  
"potentiates"[All Fields] OR "potentiating"[All Fields] OR  
"potentiation"[All Fields] OR "potentiations"[All Fields] OR  
"potentiative"[All Fields] OR "potentiator"[All Fields] OR  
"potentiators"[All Fields])) OR ("sarcoma"[MeSH Terms] OR

|                                                                |                                                                              |                                                                                                                                                                                                             |
|----------------------------------------------------------------|------------------------------------------------------------------------------|-------------------------------------------------------------------------------------------------------------------------------------------------------------------------------------------------------------|
|                                                                | "sarcoma"[All Fields] OR "sarcomas"[All Fields] OR "sarcoma s"[All Fields])) |                                                                                                                                                                                                             |
| Scopus                                                         | "Fertility sparing"<br>AND<br>"Uterine<br>sarcoma"<br>OR<br>"Sarcoma"        | (ALL FIELDS (fertility sparing) AND TITLE-ABS-KEY (uterine sarcoma OR sarcoma) AND PUBYEAR > 2011                                                                                                           |
| Cochrane<br>Central<br>Register<br>of<br>Controlle<br>d Trials | "Fertility sparing"<br>AND<br>"Sarcoma"                                      | Fertility sparing in Title Abstract Keyword AND sarcoma in Title<br>Abstract Keyword - with Cochrane Library publication date<br>Between January 2011 and June 2021 (Word variations have been<br>searched) |
